# Supplementary material for: Massive parallel sequencing in individuals with multiple primary tumours reveals the benefit of re-analysis
Source: Springer Nature journal article supplement (doi:10.1186/s13053-021-00203-z), 2021-10-28
Supplement: MOESM4 [file 19807742]

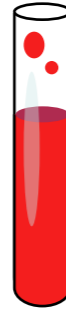

DNA isoaltion

WGS/WES

Sequence variants

Structural variants

### Custom filtering

Gene list S2A  
Protein coding/splice site  
Synonymous if splicing effect  
< 0.1% globally  
Allele fraction > 30%  
ClinVar not benign/likely benign

### Genmod/Scout

Gene list S2B+S2C  
Protein coding/splice site  
< 3 occurences locally and < 0.1% globally  
ClinVar not benign/likely benign

### Individual cancer syndrome gene list

Gene lists S3  
Protein coding and non-coding  
< 0.1% globally  
ClinVar not benign/likely benign

### Scout

Gene lists S2C  
Protein modifying  
< 5 occurances locally  
Not likely artifacts
