# Supplementary material for: Massive parallel sequencing in individuals with multiple primary tumours reveals the benefit of re-analysis
Source: Hered Cancer Clin Pract. 2021 Oct 28;19:46. doi: 10.1186/s13053-021-00203-z (PMC8555269; doi:10.1186/s13053-021-00203-z)
Supplement: Supplementary file 3 — Additional file 3: Supplementary Table S3. Genes targeted in extra analysis for each participant. [file 13053_2021_203_MOESM3_ESM.xlsx]

## Sheet: Sheet1
Supplementary Table S3
Participant	Genes targeted for extra analysis
A	MLH1, PMS2, MSH2, MSH6, EPCAM, BRCA1, BRCA2
B	APC, AXIN2, BLM, EPCAM, GALNT12, GREM1, MLH1, MSH2, MSH3, MSH6, MUTYH, NF1, PMS2, POLD1, POLE, RPS20, TP53, BRCA1, BRCA2, CDH1, STK11, CHEK2, PTEN, NTHL1, ATM
C	BRCA1, BRCA2, CHEK2, TP53, PTEN, STK11, CDH1, PALB2
D	TERT promoter, CHEK2, STK11, ATM, BAP1, BRCA1, BRCA2, CDK4, CDKN2A, DDB2, ERCC2, ERCC3, ERCC5, MITF, POT1, PTEN, TP53, WRN, XPA, XPC
E	MEN1
F	None
G	CDKN2A, CDK4, BAP1, POT1, TERT promoter, TP53, PTEN, EGFR, BAP1, BRCA1, BRCA2, DDB2, ERCC2, ERCC3, ERCC5, MITF, WRN, XPA, XPC
H	BRCA1, BRCA2, HOXB13, CHEK2, ATM, EGFR
I	BRCA1, BRCA2, CHEK2, TP53, PTEN, STK11, CDH1, PALB2, ATM
J	PDGFRA, KIT, BRCA1, BRCA2, MLH1, MSH2, MSH6, PMS2, HOXB13, CHEK2, NBN, BRIP1, STM
K	MLH1, PMS2, MSH2, MSH6, EPCAM, BRCA1, BRCA2, CHEK2, TP53, PTEN, PALB2
Massive parallel sequencing in individuals with multiple primary tumours, Familial cancer, Wallander Karin, Håkan Thonberg, Nilsson Daniel and Tham Emma, emma.tham@ki.se
